# Supplementary material
Source: PubMed Central journal article supplement (PMC2254566)
Supplement: hesr0042-1848-S1.pdf [file hesr0042-1848-S1.pdf]

## Appendix A:

### Identified measures with published psychometric data supplemental to Toolkit

| Measure name                                                                                              | Population Setting                                                                                                                                                                                                                                                              | Validity Testing                                                                                                                                                                                                               |
|-----------------------------------------------------------------------------------------------------------|---------------------------------------------------------------------------------------------------------------------------------------------------------------------------------------------------------------------------------------------------------------------------------|--------------------------------------------------------------------------------------------------------------------------------------------------------------------------------------------------------------------------------|
| Domain(s)                                                                                                 | Brief description                                                                                                                                                                                                                                                               | Reliability Data                                                                                                                                                                                                               |
| Agitation Distress Scale <sup>1</sup><br>Domain(s): Emotional symptoms                                    | Mixed cancer<br>6-item; clinician-rating scale                                                                                                                                                                                                                                  | Principal components analysis reveal only 1 component; significantly correlated with agitation items on MDAS & DRS (0.61) but scale was not correlated with cognitive items<br><br>Cronbach's 0.91; inter-rater kappa 0.72-1.0 |
| "Are you depressed?" <sup>2,3</sup><br>Domain(s): Emotional symptoms                                      | Mixed diseases<br><br>Single-item screening for depression                                                                                                                                                                                                                      | Correctly identified diagnosis of depression in all patients<br><br>Kappa=0.76 between interviewers and observers                                                                                                              |
| Bereavement Phenomenology Questionnaire (BPQ) <sup>4</sup><br>Domain(s): Grief and bereavement            | Mixed diseases<br><br>22-items, 4 point Likert scale                                                                                                                                                                                                                            | Discriminant MANOVA showed decreasing scores over time; factor analysis reveals only one factor despite being designed to assess four dimensions<br><br>Cronbach's alpha 0.93                                                  |
| Bereavement Risk Index (BRI) <sup>5</sup><br>Domain(s): Grief and bereavement                             | Mixed diseases<br><br>Uses an adapted 8-item version                                                                                                                                                                                                                            | Significant differences were found between low and high-risk groups in the Brief Symptom Inventory; results persisted 25 months after death.<br><br>NR                                                                         |
| Brief Hospice Inventory <sup>6</sup><br>Domain(s): Quality of life; Physical symptoms; Emotional symptoms | Mixed diseases<br><br>NR                                                                                                                                                                                                                                                        | Factor analysis reveals 2 factors<br><br>Cronbach's alpha 0.84-0.94                                                                                                                                                            |
| Brief scale <sup>7</sup><br>Domain(s): Quality of life                                                    | Lung cancer patients of mixed severity<br><br>(uses 2 of 5 items from Spitzer Quality of Life index); consists of 2 separate implicit scores on 3 tier scale for mood/outlook (based on 3 structured questions) and social support (based on 2 questions); clinician assessment | Reported against HADS (outlook correlation 0.61, support 0.43) and RSCL (outlook 0.64, support 0.18); correlation to corresponding Spitzer QL-Index (outlook 0.55, support 0.53)<br><br>NR                                     |
| Cambridge Palliative Assessment Schedule (CAMPAS-R) <sup>8</sup><br>Domain(s): Physical symptoms          | Mixed diseases<br><br>Patient physical and psychological symptoms, patients-rated caregiver, psychological symptoms                                                                                                                                                             | Correlated with EORTC & HADS items and scales for some symptoms but not others; significant differences between patients who did and who didn't survive<br><br>Cronbach's alpha 0.77-0.8                                       |

| <b>Measure name</b>                                                                                                        | <b>Population Setting</b>                                                                                                                                                                       | <b>Validity Testing</b>                                                                                                                                                                                                                                 |
|----------------------------------------------------------------------------------------------------------------------------|-------------------------------------------------------------------------------------------------------------------------------------------------------------------------------------------------|---------------------------------------------------------------------------------------------------------------------------------------------------------------------------------------------------------------------------------------------------------|
| <b>Domain(s)</b>                                                                                                           | <b>Brief description</b>                                                                                                                                                                        | <b>Reliability Data</b>                                                                                                                                                                                                                                 |
| Cancer Patient Need Survey <sup>9</sup><br><br>Domain(s): Needs assessment (Quality of care)                               | Mixed cancer<br><br>51 items, 5 categories - coping needs, help needs, information needs, work needs, cancer shock needs                                                                        | Discriminant validity with different scores for hospice and clinic patients - may need different instrument for hospice patients<br><br>Cronbach's alpha 0.91                                                                                           |
| Caregiving at Life's End Questionnaire <sup>10</sup><br><br>Domain(s): Caregiver well-being                                | Caregivers<br><br>Seven scales; hospice caregiving experience, addressing issues such as tasks, closure, and gain; self-administered                                                            | Concurrent: scales were correlated with each other as expected (e.g., caregiver comfort and importance of caregiving tasks r=0.6)<br><br>Internal consistency: cronbach's alpha 0.67-0.90; test-retest nonsignificant differences                       |
| Comfort Assessment in Dying with Dementia (CAD-EOLD) <sup>11</sup><br><br>Domain(s): Physical symptoms, Emotional symptoms | Single disease -advanced dementia<br><br>14 items; 4 subscales (physical distress, dying symptoms, emotional distress, well being)                                                              | Item-total correlations range 0.39 to 0.79; correlation for symptom items on SM-EOLD r = 0.475 to 0.559<br><br>Cronbach's alpha 0.85 overall; subscales (physical distress r=0.74, dying symptoms r=0.70, emotional distress r=0.82, well being r=0.80) |
| Communication Capacity Scale <sup>1</sup><br><br>Domain(s): Emotional symptoms                                             | Mixed cancer<br><br>5 item; clinician-rating scale                                                                                                                                              | Principal components analysis show only 1 component; highly associated with cognitive items on MDAS and Delirium Rating Scale (0.83); not correlated with agitation items<br><br>Cronbach's 0.96; inter-rater kappa 0.78-0.95                           |
| Concept of a Good Death measure <sup>12</sup><br><br>Domain(s): Multidimensional measure (Palliative Outcomes)             | Mixed diseases; not used with patients<br><br>17 descriptive statements of components that might be related to concept of good death; 3 subscales: closure, personal control, clinical criteria | Factor analysis - 3 subscales; small-to moderate association with other measures suggesting that these are distinct but related constructs; some items with low variability<br><br>Test-retest: ICC 0.66-0.83.                                          |
| Core Bereavement Items (CBI) <sup>13</sup><br><br>Domain(s): Grief and bereavement                                         | Mixed diseases<br><br>17 items, 3 subscales, measuring bereavement phenomena (developed from Bereavement Phenomenology Questionnaire)                                                           | Factor analysis to develop subscales; face validity examines -kept subscales that described key components of bereavement; discriminant validity to time and group effects<br><br>Cronbach's alpha 0.91                                                 |

| <b>Measure name</b>                                                                                         | <b>Population Setting</b>                                                                                                                                                                                               | <b>Validity Testing</b>                                                                                                                                                                                                                                                                                                                                                                              |
|-------------------------------------------------------------------------------------------------------------|-------------------------------------------------------------------------------------------------------------------------------------------------------------------------------------------------------------------------|------------------------------------------------------------------------------------------------------------------------------------------------------------------------------------------------------------------------------------------------------------------------------------------------------------------------------------------------------------------------------------------------------|
| <b>Domain(s)</b>                                                                                            | <b>Brief description</b>                                                                                                                                                                                                | <b>Reliability Data</b>                                                                                                                                                                                                                                                                                                                                                                              |
| Cornell Scale for Depression in Dementia (CSDD) <sup>14</sup><br><br>Domain(s): Emotional symptoms          | Single disease - dementia; elderly nursing home residents<br><br>19 items (16 items retained in 4 domains), 3 level scale; 2 steps - clinician interview of caregiver, brief patient interview and clinical observation | Oblique rotation 4-factor matrix with eigenvalues >1.0 account 50% variance; inter-factor correlation 0.30 for depression and disturbed sleep, others <0.181; criterion-validity done; no testing with external scales<br><br>Internal consistency 0.76 total 16 item, depression subscale 0.75, somatic 0.72; Cronbach's 0.76                                                                       |
| Cost and Reciprocity Index (CRI) <sup>15</sup><br><br>Domain(s): Caregiver well-being                       | NR<br><br>25 items(modified), 4 subscales, face-to face for hospice caregivers; concepts of social support, reciprocity, cost, and conflict                                                                             | Testing was done of the original instrument in healthy populations - relations between subscales are consistent with theoretical framework.<br><br>Cronbach's alpha 0.68-0.83                                                                                                                                                                                                                        |
| Decisional Conflict Scale (DCS) <sup>16</sup><br><br>Domain(s): Advance care planning (Treatment decisions) | Mixed diseases; applied scale to cancer patients<br><br>16 items, 5 point Likert scales; 3 subscales (uncertainty, factors contributing, and effective decision making)                                                 | Construct validity among subscales 0.58 - 0.76; criterion validity significant between certain vs. uncertain groups; 3 factor model rejected (4 factor suggested in exploratory work)<br><br>Prior testing - internal consistency 0.78-0.89; test-retest >0.80; in combined subscales in this study - uncertainty 0.75, factor contributing 0.82, and decision making 0.82                           |
| Demoralization Scale <sup>17</sup><br><br>Domain(s): Emotional symptoms                                     | Mixed cancer<br><br>24 items, 5 subscales, self-administered                                                                                                                                                            | Concurrent: correlations between different subscales and numerous other scales were significant, such as the McGill QOL, BDI, PHQ, Beck's measure of hopelessness, and desire for hastened death; Divergent: appears to be a different construct than depression, since some patients with high scores on this scale are not depressed on the BDI or PHQ<br><br>Subscale cronbach's alphas 0.71-0.89 |
| Duke-UNC Social Support Scale <sup>18</sup><br><br>Domain(s): Quality of life                               | Single disease - lung cancer<br><br>NR                                                                                                                                                                                  | NR<br><br>Cronbach's overall 0.94, subscales 0.88 to 0.92                                                                                                                                                                                                                                                                                                                                            |
| Dyspnea Descriptor Questionnaire <sup>19</sup><br><br>Domain(s): Physical symptoms (dyspnea)                | Single disease -heart failure; study done as convenience sample at single emergency department<br><br>13 descriptors asked retrospectively (derived from literature search)                                             | Factor analysis done - 4 factor 71%<br><br>Cronbach's 0.95; inter-item correlation 0.60                                                                                                                                                                                                                                                                                                              |

| <b>Measure name</b>                                                                                   | <b>Population Setting</b>                                                                                                                                                   | <b>Validity Testing</b>                                                                                                                                                                                                                                                                                                                                                                                                                                                                                                                                                                                                                                                                  |
|-------------------------------------------------------------------------------------------------------|-----------------------------------------------------------------------------------------------------------------------------------------------------------------------------|------------------------------------------------------------------------------------------------------------------------------------------------------------------------------------------------------------------------------------------------------------------------------------------------------------------------------------------------------------------------------------------------------------------------------------------------------------------------------------------------------------------------------------------------------------------------------------------------------------------------------------------------------------------------------------------|
| <b>Domain(s)</b>                                                                                      | <b>Brief description</b>                                                                                                                                                    | <b>Reliability Data</b>                                                                                                                                                                                                                                                                                                                                                                                                                                                                                                                                                                                                                                                                  |
| Edmonton Functional Assessment Tool (EFAT-2) <sup>20,21</sup><br><br>Domain(s): Functional status     | Mixed diseases<br><br>10 items (revised version); professional grading and evaluation scale describing symptoms and functions, one summary functional assessment; 0-4 scale | Concurrent validity shows it to be highly correlated with KPS and ECOG; total score highly correlated with global scale. Construct validity distinguished between inpatients and home palliative care patients. EFAT -2 (revision of EFAT) <sup>22</sup> not correlated with pain; significantly different in different groups based on discharge location; factor analysis: 2 components - physical & cognitive/affective<br><br>Inter-rater, ICC 0.71; Cronbach's alpha 0.86; Interrater ICC 0.97 for self trained clinicians (n = 2) and 0.95 for formal trained (n = 2); kappa on items ranged from 0.25 to 0.96 for self trained clinician pair and 0.17 to 0.95 for formal trained |
| Edmonton Staging System (revised rESS) <sup>23</sup><br><br>Domain(s): Physical symptoms              | Mixed cancer<br><br>4 pain and patient features; tool for classifying cancer pain; clinician assessment                                                                     | Only 3 variables were associated with time to achieve stable pain control in multivariate analysis; patients in poorest prognostic category required more time to achieve stable pain control<br><br>Inter-rater correlations range 0.68-0.95                                                                                                                                                                                                                                                                                                                                                                                                                                            |
| Emanuel and Emanuel Medical Directive (revised) <sup>24</sup><br><br>Domain(s): Advance care planning | Mixed disease<br><br>4 hypothetical scenarios, with 2 goals and 6 treatments for each                                                                                       | Concurrent: consistently lower preference scores across situations for those with goal "comfort care" vs "prolong life" (p<0.0001); Discriminant: hospice patients wanted fewer life-sustaining treatments than non-hospice (p<0.05 for some treatments)<br><br>71-86% endorsed "comfort care" across all hypothetical scenarios; over 21-day follow-up, test-retest kappa 0.5-0.58; Cronbach's alpha across life-sustaining treatments 0.8 within situation, and 0.66-0.86 between treatments across situations, except for pain. Article also summarized extensive psychometric evaluation of previous versions.                                                                       |
| Family Assessment Device (FAD) <sup>25</sup><br><br>Domain(s): Caregiver well-being, Satisfaction     | Mixed disease<br><br>12 items; assess family functioning                                                                                                                    | NR<br><br>Inter-item correlations met criterion (minimum 50% with r = 0.3 to 0.7) for 18 of 20 items; item correlation to total score 0.4 to 0.75 for 12 of 12 items; Cronbach's alpha 0.88                                                                                                                                                                                                                                                                                                                                                                                                                                                                                              |

| <b>Measure name</b>                                                                                           | <b>Population Setting</b>                                                                                                                                                                                                                                     | <b>Validity Testing</b>                                                                                                                                                                                                                                                                                                                              |
|---------------------------------------------------------------------------------------------------------------|---------------------------------------------------------------------------------------------------------------------------------------------------------------------------------------------------------------------------------------------------------------|------------------------------------------------------------------------------------------------------------------------------------------------------------------------------------------------------------------------------------------------------------------------------------------------------------------------------------------------------|
| <b>Domain(s)</b>                                                                                              | <b>Brief description</b>                                                                                                                                                                                                                                      | <b>Reliability Data</b>                                                                                                                                                                                                                                                                                                                              |
| Family Caregiver Medication Administration Hassles Scale <sup>26</sup><br><br>Domain(s): Caregiver well-being | Community study (details of patients not given) - looks at problems caregivers experience with assisting elderly with medications<br><br>24 items paper survey; 4 subscales (information, safety issues, scheduling, & polypharmacy); scale 0-5 for each item | Principal components and factor analysis done (66.5% cumulative variance; construct validity to Medication Complexity Index (r=0.19) & modified Caregiver Strain Index (r=0.44)<br><br>Test-Retest at 2 weeks (n=53) 0.84 (0.78-0.85 Pearson correlation across subscales); internal consistency 0.95; Cronbach's alpha (0.80-0.92 across subscales) |
| Family Perception of Care Scale (FPCS) <sup>27</sup><br><br>Domain(s): Satisfaction                           | Mixed disease, long-term care<br><br>27 items, 4 subscales; end-of-life care in long-term care facilities; self-administered                                                                                                                                  | Higher scores when death occurred in facility than in hospital (p<0.001)<br><br>Subscale cronbach's alphas 0.78-0.95                                                                                                                                                                                                                                 |
| F-Care Expectations Scale <sup>25</sup><br><br>Domain(s): Satisfaction                                        | Mixed diseases<br><br>16 items; assess family care expectations                                                                                                                                                                                               | NR<br><br>Inter-item correlations met criterion (minimum 50% with r = 0.3 to 0.7) for 13 of 16 items; item correlation to total score 0.4 to 0.72 for 12 of 16 items; Cronbach's alpha 0.88                                                                                                                                                          |
| F-Care Perceptions Scale <sup>25</sup><br><br>Domain(s): Satisfaction                                         | Mixed diseases<br><br>21 items; assess family members care perceptions                                                                                                                                                                                        | NR<br><br>Inter-item correlations met criterion (minimum 50% with r = 0.3 to 0.7) for 18 of 21 items; item correlation to total score 0.4 to 0.72 for 13 of 21 items; Cronbach's alpha 0.86                                                                                                                                                          |
| Frail Elderly Functional Assessment Questionnaire (FEFA) <sup>28</sup><br><br>Domain(s): Functional status    | Mixed diseases; age > 65 years; homebound and nursing home<br><br>19 items; assess function in elderly at very low activity level; interviewer administered                                                                                                   | Correlation to direct observation (r=0.90); also Katz's ADL index (r=0.86), Barthel index (r=0.91), Lawton's IADL index (r=0.67)<br><br>Test-retest in n = 29 at 2 week interval - kappa 0.82 overall, all items > 0.40 (0.45-0.91)                                                                                                                  |
| Grief Evaluation Measure <sup>29</sup><br><br>Domain(s): Grief and bereavement                                | Bereaved family members<br><br>Experiences section -58 items, problems section - 33 items; self-administered                                                                                                                                                  | Concurrent: correlated with IES-R subscales (Impact of Event Scale - Revised) (r=0.48-0.76), TOP (Treatment Outcome Package) depression subscale 0.76-0.92 Predictive: predicted psychological adjustment (ITG - inventory of traumatic grief - r=.67)<br><br>Test-retest: r 0.88-0.97; cronbach's alpha: 0.91-0.97                                  |

| <b>Measure name</b>                                                                                                                                                              | <b>Population Setting</b>                                                                                                                    | <b>Validity Testing</b>                                                                                                                                                                                                                                                                                                                                                                                                                                                                                                                                                                                                                                                                                                                                                                                                                                   |
|----------------------------------------------------------------------------------------------------------------------------------------------------------------------------------|----------------------------------------------------------------------------------------------------------------------------------------------|-----------------------------------------------------------------------------------------------------------------------------------------------------------------------------------------------------------------------------------------------------------------------------------------------------------------------------------------------------------------------------------------------------------------------------------------------------------------------------------------------------------------------------------------------------------------------------------------------------------------------------------------------------------------------------------------------------------------------------------------------------------------------------------------------------------------------------------------------------------|
| <b>Domain(s)</b>                                                                                                                                                                 | <b>Brief description</b>                                                                                                                     | <b>Reliability Data</b>                                                                                                                                                                                                                                                                                                                                                                                                                                                                                                                                                                                                                                                                                                                                                                                                                                   |
| Grief Experience Inventory (GEI) <sup>24</sup><br><br>Domain(s): Grief and bereavement                                                                                           | NR<br><br>102 statement self-administered inventory scaled yes/no; nine composite scales including 3 validity and 6 domains                  | Discriminant validity bereaved versus non-bereaved reported significant at 0.001 level on all subscales<br><br>Test-retest coefficients 0.53-0.87; Cronbach's alpha 0.52-0.84 on bereavements scales                                                                                                                                                                                                                                                                                                                                                                                                                                                                                                                                                                                                                                                      |
| Hebrew Rehabilitation Center for Aged index (HRCA-QL) <sup>30</sup><br><br>Domain(s): Quality of life                                                                            | Adapted for patients with advanced cancer<br><br>Version of the Spitzer Quality of Life index                                                | Scores declined as patients became closer to death; sensitive to change in status; criterion validity correlated with KPS and IADL index<br><br>Cronbach's alpha 0.7-0.78; test-retest: 0.89; inter-rater 0.67                                                                                                                                                                                                                                                                                                                                                                                                                                                                                                                                                                                                                                            |
| Hogan Grief Reaction Checklist (HGRC) <sup>31</sup><br><br>Domain(s): Grief and bereavement                                                                                      | Mixed diseases<br><br>61 items; six constructs, (despair, panic behavior, blame and anger, disorganization, detachment, and personal growth) | Convergent validity to TRIG, GEI and IES ranged from $r = 0.20$ to $0.78$ with significant correlations across subscales; discriminant validity in subset of mothers who experienced death of a child by different mechanisms (illness, accident, suicide, or homicide) revealed differences in blame and anger; discriminant validity with subset of mothers with deaths <or>3 years in past revealed difference in intensity of grief and personal growth; factor analysis reported<br><br>Cronbach's alpha overall 0.90 (despair 0.89, panic behavior 0.90, blame and anger 0.79, disorganization 0.84, detachment 0.87, and personal growth 0.82); test-retest over 4 week interval significant at $p < 0.001$ (despair $r = 0.79$ , blame and anger $r = 0.56$ , disorganization $r = 0.85$ , detachment $r = 0.77$ and personal growth $r = 0.81$ ) |
| Hospice Pressure Ulcer Risk Assessment Scale (HoRT) <sup>32</sup><br><br>Domain(s): Clinical assessment tool                                                                     | Mixed diseases<br><br>assess physical activity, age, mobility                                                                                | discriminant validity with statistically significant differences between patients with and without ulcers. PPV 50%, NPV 100%.<br><br>NR                                                                                                                                                                                                                                                                                                                                                                                                                                                                                                                                                                                                                                                                                                                   |
| Hospital Anxiety and Depression Scale (HADS) <sup>33</sup><br><br>Domain(s): Emotional symptoms                                                                                  | Breast cancer<br><br>self-report, 7-items depression, 7-items anxiety; tries to discriminate between anxiety and depression                  | Using cutoff value of tool, sensitivity/specificity (depression) 75%, 75%, misclassification rate 25%; (anxiety) 75%, 90%, 12%<br><br>NR                                                                                                                                                                                                                                                                                                                                                                                                                                                                                                                                                                                                                                                                                                                  |
| Index of support; done as part of Canadian Study of Health and Aging (CSHA) <sup>34</sup><br><br>Domain(s): Instrumental support available to older Canadian community residents | Community study of elderly<br><br>6 items; 4 level scales; interview                                                                         | 4 phases: factor analysis (item correlations 0.26 to 0.83), item response theory analysis, external (construct and predictive validity on 2nd half of study population), and IRT( $r=0.53$ to network size)/classical ( $r=0.61$ ) comparison<br><br>Cronbach's alpha 0.76; IRT marginal reliability 0.85                                                                                                                                                                                                                                                                                                                                                                                                                                                                                                                                                 |

| <b>Measure name</b>                                                                                                                  | <b>Population Setting</b>                                                                                                                                          | <b>Validity Testing</b>                                                                                                                                                                                                                                                                                                                                                                                                                                                                                                                                                                                          |
|--------------------------------------------------------------------------------------------------------------------------------------|--------------------------------------------------------------------------------------------------------------------------------------------------------------------|------------------------------------------------------------------------------------------------------------------------------------------------------------------------------------------------------------------------------------------------------------------------------------------------------------------------------------------------------------------------------------------------------------------------------------------------------------------------------------------------------------------------------------------------------------------------------------------------------------------|
| <b>Domain(s)</b>                                                                                                                     | <b>Brief description</b>                                                                                                                                           | <b>Reliability Data</b>                                                                                                                                                                                                                                                                                                                                                                                                                                                                                                                                                                                          |
| <p>Kansas City Cardiomyopathy Questionnaire<sup>35</sup></p> <p>Domain(s): Quality of life; Physical symptoms; Functional status</p> | <p>Single disease - CHF</p> <p>Self-administered, 23-items, HRQOL in CHF</p>                                                                                       | <p>Convergent validity 0.46 - 0.74 across 7 domains; physical limitation to 6-minute walk (r=0.48), SF-36 (r=0.84), LiHFe (0.65); responsiveness higher than LiHFe and SF-36 for admission with CHF exacerbation</p> <p>Cronbach's alpha 0.62-0.95 across 7 domains; test-retest at 3 months without exacerbation 0.8 to 4 point changes in 1-100 point scale</p>                                                                                                                                                                                                                                                |
| <p>Life Closure Scale (LCS)<sup>36</sup></p> <p>Domain(s): Spirituality</p>                                                          | <p>Mixed cancer diagnoses</p> <p>45 items; assess psychological adaptation in dying</p>                                                                            | <p>Content validity with interviews and experts evaluation</p> <p>Cronbach's alpha 0.80</p>                                                                                                                                                                                                                                                                                                                                                                                                                                                                                                                      |
| <p>Life Evaluation Questionnaire (LEQ)<sup>22</sup></p> <p>Domain(s): Quality of life</p>                                            | <p>Mixed diseases</p> <p>121 items, 0-60 scale; self-administered; five subscales (freedom, appreciation of life, contentment, resentment, social integration)</p> | <p>Convergent validity to RSCL ranged from 0.01 to 0.62 (sufficient only for freedom, resentment, and social integration); convergent to MacAdam and Smith Support scale factor ranged from 0.02 to 0.62 and similarly sufficient only for freedom, resentment, and social integration; analysis with five components reported.</p> <p>Cronbach's alpha (freedom 0.70, appreciation of life 0.76, contentment 0.76, resentment 0.85, social integration 0.78); test-retest n=40, at 2-3 days (freedom r=0.80, appreciation of life r=0.91, contentment r=0.77, resentment r=0.92, social integration r=0.84)</p> |
| <p>Linear Analogue Scale (LAS) for quality of life in cancer patients<sup>37</sup></p> <p>Domain(s): Quality of life</p>             | <p>Mixed cancer</p> <p>5 questions, linear analogue scale, self-assessment</p>                                                                                     | <p>Correlation between LAS and performance status (r=0.46); questionnaire and performance status (r=0.38) - overall poor performance noted</p> <p>Cronbach's alpha 0.75; subgroup LAS (alpha 0.58) compared to questionnaire (0.93); n=41 test-retest LAS (29.3% of cases judged reliable), questionnaire (82.9%)</p>                                                                                                                                                                                                                                                                                            |

| Measure name<br><br>Domain(s)                                                                                                                 | Population Setting<br><br>Brief description                                                                                         | Validity Testing<br><br>Reliability Data                                                                                                                                                                                                                                                                                                                                                                                                                                                                                                                                                                                                                                                                                                                                                                                                                                                                             |
|-----------------------------------------------------------------------------------------------------------------------------------------------|-------------------------------------------------------------------------------------------------------------------------------------|----------------------------------------------------------------------------------------------------------------------------------------------------------------------------------------------------------------------------------------------------------------------------------------------------------------------------------------------------------------------------------------------------------------------------------------------------------------------------------------------------------------------------------------------------------------------------------------------------------------------------------------------------------------------------------------------------------------------------------------------------------------------------------------------------------------------------------------------------------------------------------------------------------------------|
| Lung Cancer Symptom Scale (LCCS) <sup>38-41</sup><br><br>Domain(s): Quality of life; Physical symptoms; Emotional symptoms; Functional status | Single disease - lung cancer<br><br>2 scales; patient - 9 items visual scale (100mm) and observer - 6 items (4 point or none scale) | Construct validity with KPS 0.15-0.63 across items (symptomatic distress 0.49, effect on activities 0.63, QOL 0.43); criterion validity (patient scale / observer scale respectively) - KPS (r=0.63, NA), SIP(0.40, 0.56), POMS(0.67,0.54), ATS 29 cough (0.56, 0.65) and dyspnea (0.46, 0.64), SF-MPQ (items range 0.51 - 0.67); content validity (high agreement noted without specific data); construct validity between scales: cough (r=0.74), dyspnea (r=0.66), hemoptysis (r=0.71), pain (r=0.71), wt loss (r=0.61); criterion validity to Karnofsky r=0.59<br><br>Cronbach's alpha 0.82 (patient scale) and 0.75 (observer); internal consistency to BSI (r=0.93), SIP (r=0.94), POMS (r=0.94), SF-MPQ (r=0.91, r=0.64-0.74 for 3 components); test-retest r>0.75 for all items; interobserver r>0.75 for all items except cough (r=0.65) and weakness (r=0.54); note weakness has subsequently been dropped |
| McMaster Quality of Life Scale <sup>42</sup><br><br>Domain(s): Quality of life                                                                | Mixed cancer<br><br>Administered to proxies or patients; responsive to perceptions of change in clinical status (p=0.01)            | Concurrent validity as correlated well with Spitzer QOL (r=0.7); those able to rate it themselves rated QOL higher than those who needed to have it read to them (p=0.04); days until death explained 7% of the variance in QOL<br><br>Interobserver r = 0.83-0.95; intrarater 1 week 0.63 (lower than on same day); Cronbach's 0.8                                                                                                                                                                                                                                                                                                                                                                                                                                                                                                                                                                                  |
| Measure of patients' assessment of the quality of communication about end-of-life care <sup>43</sup><br><br>Domain(s): Advance care planning  | Single disease - HIV/AIDS<br><br>4 items                                                                                            | Correlated with overall satisfaction with medical care (0.76); those with higher-rated communication had clinicians more likely to know if the had a durable power of attorney<br><br>Cronbach's alpha 0.81                                                                                                                                                                                                                                                                                                                                                                                                                                                                                                                                                                                                                                                                                                          |
| Mental Adjustment to Cancer (MAC) scale (revised as G-MAC) <sup>44</sup><br><br>Domains: Emotional symptoms                                   | Mixed cancer<br><br>25 items in revised version, 5 dimensions; self-administered                                                    | Concurrent: patients with better performance status by ECOG had significantly higher mean scores on "hopeless" dimension<br><br>internal consistency: alpha 0.62-0.93; test-retest: r=0.8                                                                                                                                                                                                                                                                                                                                                                                                                                                                                                                                                                                                                                                                                                                            |
| Needs assessment for advanced cancer patients (NA-ACP) <sup>45</sup><br><br>Domain(s): Needs assessment (quality of care)                     | Mixed cancer<br><br>7 domains; 132 items; self-administered                                                                         | Construct: principal components analysis demonstrated 7 components<br><br>Internal consistency: alpha 0.79-0.98; test-retest: ICC 0.67-0.93; 103 of the items had kappa >0.4                                                                                                                                                                                                                                                                                                                                                                                                                                                                                                                                                                                                                                                                                                                                         |



| <b>Measure name</b>                                                                                                                                                          | <b>Population Setting</b>                                                                                                                                               | <b>Validity Testing</b>                                                                                                                                                                                                                                                                                                                                                                                                                                                                                                                                                                                      |
|------------------------------------------------------------------------------------------------------------------------------------------------------------------------------|-------------------------------------------------------------------------------------------------------------------------------------------------------------------------|--------------------------------------------------------------------------------------------------------------------------------------------------------------------------------------------------------------------------------------------------------------------------------------------------------------------------------------------------------------------------------------------------------------------------------------------------------------------------------------------------------------------------------------------------------------------------------------------------------------|
| <b>Domain(s)</b>                                                                                                                                                             | <b>Brief description</b>                                                                                                                                                | <b>Reliability Data</b>                                                                                                                                                                                                                                                                                                                                                                                                                                                                                                                                                                                      |
| Pain Assessment in Advanced Dementia (PAINAD) <sup>46</sup><br><br>Domain(s): Physical symptoms                                                                              | Single disease - advanced dementia patients in nursing home<br><br>5 items with 5 subdomains of pain each with scale 3 levels (29 choices); overall additive score 0-10 | Factor analysis done; convergent analysis to DS-DAT & DS-VAS (r=0.76, n=19) and PAIN-VAS (r=0.75, n=18) - note also done in different conditions (r>=0.82 in activity)<br><br>Multiple observations across 44 patients; Cronbach's alpha 0.57 - 0.83 in multiple phases                                                                                                                                                                                                                                                                                                                                      |
| Palliative Care Outcome Scale (POS) <sup>47,48 *</sup><br><br>Domain(s): Quality of care; Physical symptoms; Functional status; Continuity of care; Multidimensional measure | Mixed diseases<br><br>2 parts - patient & staff; each 12 items, most 0-4 scale; general audit designed as a palliative care outcome measure, eight site study           | Construct validity r=0.43-0.80 against ETORTC QLC-C30 AND STAS (n=29 patients, 43 staff); change over time not statistically significant; face validity by patient survey (n=12 - qualitative)<br><br>Test-retest for seven items kappa -0.08-0.62 with % agreement 74-100%; Cronbach's alpha patient part (0.65) & staff part (0.70); Kappa > 0.3 staff compared to patient responses for 8 out of 10 items                                                                                                                                                                                                 |
| Palliative Care Quality of Life Instrument (PQLI) <sup>49</sup><br><br>Domain(s): Quality of life                                                                            | Mixed cancer<br><br>28 items, 6 scales                                                                                                                                  | Face validity: expert review, patients asked to pick most important issues, rate scales; compared patients with better & worse ECOG performance status (significant); responsiveness before and after treatment; factor analysis; construct - correlated with AQEL (correlation coefficients 0.44-0.94) and EORTC - QLQ-C30 (0.79-0.97); criterion: ability to predict independent criterion variables (p<0.001); convergent & discriminative: related to corresponding & not to non-corresponding variables on interview (p<0.001)<br><br>Cronbach's alpha 0.79; test-retest coefficients of agreement 0.82 |
| Physical Disability Index (PDI) <sup>50</sup><br><br>Domain(s): Functional status                                                                                            | NR<br><br>54 items, for use with frail individuals; requires calibrated specialized performance measuring equipment                                                     | Discriminant validity against Folstein Mini-Mental State Exam (r=0.11); convergent validity Physical Self-Maintenance Scale (r=-0.71) and Sickness Impact Profile (r=-0.59);<br><br>Test-retest in n = 36 at 2-5 days 0.97 overall, 4 subscales 0.92-0.96; interrater reliability 0.81-0.99 (mobility scale -0.02-0.70)                                                                                                                                                                                                                                                                                      |
| Postal questionnaire to examine career satisfaction with palliative care <sup>51</sup><br><br>Domain(s): Satisfaction                                                        | Mixed diseases<br><br>89 question; after-death postal survey of caregivers                                                                                              | Discriminant validity tested with 36 attitudinal questions when health problems identified - only 4 were significant by Chi square; convergent testing reported in tabular form in reference<br><br>Cronbach's alpha 0.68 to 0.84 across 7 subsets                                                                                                                                                                                                                                                                                                                                                           |
| Problems and Needs in Palliative Care Questionnaire (PNPC) <sup>52</sup><br><br>Domain(s): Needs assessment (quality of care)                                                | Mixed cancer<br><br>13 dimensions, 138 items, self-administered                                                                                                         | Convergent - significant correlations with related EORTC and COOP-WONCA QOL measures; needs further psychometric testing<br><br>Cronbach's alpha >0.65 for most dimensions                                                                                                                                                                                                                                                                                                                                                                                                                                   |

| Measure name<br><br>Domain(s)                                                                                                                                                                                            | Population Setting<br><br>Brief description                                                                                                                                                          | Validity Testing<br><br>Reliability Data                                                                                                                                                                                                                                                                                                                                                                                                                                                                                                                                                                                                                                                                                                                                                                                                                                                                                                                                   |
|--------------------------------------------------------------------------------------------------------------------------------------------------------------------------------------------------------------------------|------------------------------------------------------------------------------------------------------------------------------------------------------------------------------------------------------|----------------------------------------------------------------------------------------------------------------------------------------------------------------------------------------------------------------------------------------------------------------------------------------------------------------------------------------------------------------------------------------------------------------------------------------------------------------------------------------------------------------------------------------------------------------------------------------------------------------------------------------------------------------------------------------------------------------------------------------------------------------------------------------------------------------------------------------------------------------------------------------------------------------------------------------------------------------------------|
| <p>Quality of Dying and Death (QODD)<sup>53-56*</sup></p> <p>Domain(s): Quality of Care - multidimensional life, Functional Status, Advance Care Planning, Spirituality, Grief and Bereavement, Caregiver Well-Being</p> | <p>Mixed diseases</p> <p>31 item family after-death interview across 6 domains; separate 23-item ICU version; 2 parts assess frequency and quality ratings; also 14-item nurse caregiver measure</p> | <p>Measure development included qualitative data from multiple focus groups and interviews. QODD 31-item family after-death measure: construct validity <math>r=-0.52</math> against MSAS, <math>r=-0.47</math> MSAS psychological sub-score, <math>r=-0.42</math> MSAS physical sub-score; discriminative study with independent symptom questionnaire significant at <math>p&lt;0.01</math>, preferences at <math>p&lt;0.01</math>, and communication <math>p&lt;0.001</math>; correlation to global rating of last 7 days of life <math>r=0.55</math>, moment of death <math>r=0.51</math> (two factors explaining 38% of QODD variance)</p> <p>Overall 31-items QODD Cronbach's alpha 0.89; Cronbach's alpha 0.96 for 14 item RN version; interobserver reliability 0.44 for overall QODD (23-item ICU version) after-death survey; components ranged from 0.15 to 1.0 for frequency components (mean 0.54), 0.16 to 0.59 for quality rating component (mean 0.32)</p> |
| <p>Quality of End-of-Life Care and Satisfaction with Treatment (QUEST)<sup>57</sup></p> <p>Domain(s): Satisfaction</p>                                                                                                   | <p>Mixed diseases</p> <p>4 scales (MD care, MD satisfaction, RN care, RN satisfaction); patients &amp; surrogates, rate RNs &amp; MDs</p>                                                            | <p>Reviewed by experts; construct - correlate with PSI (Patient Satisfaction Index) 0.38-0.47; subscales correlated with each other (0.47-0.69); not correlated with unrelated constructs; positive skew distribution for many items; negative correlation with symptoms; patients scores were lower for patients with DNR orders</p> <p>Test-retest: kappa 0.43-0.86 (1-2 days); Cronbach's 0.83-0.95</p>                                                                                                                                                                                                                                                                                                                                                                                                                                                                                                                                                                 |
| <p>QUAL-E (Quality of Life at End of Life)<sup>58*</sup></p> <p>Domain(s): Quality of life</p>                                                                                                                           | <p>Mixed diseases</p> <p>24 items</p>                                                                                                                                                                | <p>Factor analysis reveals 5 domains: life completion, relationships with the health care system, preparation/anticipatory concerns, symptom impact, connectedness and affective social support.</p> <p>Cronbach's alpha 0.6-0.84</p>                                                                                                                                                                                                                                                                                                                                                                                                                                                                                                                                                                                                                                                                                                                                      |
| <p>Relatives' patient management questionnaire<sup>59</sup></p> <p>Domain(s): Advance care planning; Satisfaction</p>                                                                                                    | <p>Mixed cancer</p> <p>21 items, 5 scales in final version: families' attitudes, perceptions, and patterns of choice in management of terminal cancer patients</p>                                   | <p>Construct validity inter-scale correlations 0.6-0.86; discriminant low correlation with unrelated items</p> <p>Cronbach's alpha 0.5-0.69</p>                                                                                                                                                                                                                                                                                                                                                                                                                                                                                                                                                                                                                                                                                                                                                                                                                            |
| <p>Resident Assessment Instrument for Palliative Care (RAI-PC)<sup>25</sup></p> <p>Domain(s): Physical symptoms; Emotional symptoms; Functional status; Advance care planning; Spirituality; Palliative Outcomes</p>     | <p>NR</p> <p>Builds on RAI for NH resident assessment; 9 domains; for clinician assessment in NH</p>                                                                                                 | <p>NR</p> <p>Interobserver - kappa 0.77-0.9</p>                                                                                                                                                                                                                                                                                                                                                                                                                                                                                                                                                                                                                                                                                                                                                                                                                                                                                                                            |

| <b>Measure name</b>                                                                                                         | <b>Population Setting</b>                                                                                                                                                                                                                                                  | <b>Validity Testing</b>                                                                                                                                                                                                                                                                                                                                                                                                                                                                                                                                                                                                                                                         |
|-----------------------------------------------------------------------------------------------------------------------------|----------------------------------------------------------------------------------------------------------------------------------------------------------------------------------------------------------------------------------------------------------------------------|---------------------------------------------------------------------------------------------------------------------------------------------------------------------------------------------------------------------------------------------------------------------------------------------------------------------------------------------------------------------------------------------------------------------------------------------------------------------------------------------------------------------------------------------------------------------------------------------------------------------------------------------------------------------------------|
| <b>Domain(s)</b>                                                                                                            | <b>Brief description</b>                                                                                                                                                                                                                                                   | <b>Reliability Data</b>                                                                                                                                                                                                                                                                                                                                                                                                                                                                                                                                                                                                                                                         |
| Rotterdam Symptom Checklist (RSCL) <sup>33</sup><br><br>Domain(s): Physical symptoms; Emotional symptoms; Functional status | Single disease - breast cancer<br><br>Self-report; 3 subscales: physical (22 items), psychological (8 items), ADL (8 items); 4 point scale                                                                                                                                 | Using cutoff value of tool, sensitivity/specificity 75%, 80%; misclassification rate 21%<br><br>NR                                                                                                                                                                                                                                                                                                                                                                                                                                                                                                                                                                              |
| Santa Clara Strength of Religious Faith Questionnaire (SCSORF) <sup>60</sup><br><br>Domain(s): Spirituality                 | Mixed cancer<br><br>10-items developed to evaluate links with psychological health                                                                                                                                                                                         | Convergent: strongly correlated with intrinsic religiosity, moderately correlated with religious practice, perception of self as spiritual, comfort derived from religion.<br><br>Test-retest: 0.82; Cronbach's alpha 0.95.                                                                                                                                                                                                                                                                                                                                                                                                                                                     |
| Satisfaction With Care at the End of Life in Dementia (SWC-EOLD) <sup>11</sup><br><br>Domain(s): Satisfaction               | Single disease - dementia<br><br>10 items; 4-point scale; one-factor                                                                                                                                                                                                       | Item-total correlations range 0.33 to 0.79<br><br>Cronbach's alpha 0.90                                                                                                                                                                                                                                                                                                                                                                                                                                                                                                                                                                                                         |
| Structured Interview for Symptoms and Concerns (SISC) <sup>61</sup><br><br>Domain(s): Emotional symptoms; Physical symptoms | Mixed cancer<br><br>13 items; addressed broad range of symptoms briefly; interviewer-administered                                                                                                                                                                          | Concurrent: concordance with VAS measures (correlations >0.7); sensitive to differences between subgroups with or without anxiety or depression<br><br>Interrater: intraclass correlations >0.9; test-retest 0.5-0.9                                                                                                                                                                                                                                                                                                                                                                                                                                                            |
| Support Team Assessment Schedule (STAS) <sup>57</sup><br><br>Domain(s): Physical symptoms; Multidimensional measure         | Mixed diseases - broadly across hospice patients; one study <sup>36</sup> applied to acute care oncology unit and a palliative care unit<br><br>17 items, scale 0-4; 7 items grouped into a) patient and family items (4) and b) service items (3); interview administered | Validity by comparison of type of rater: kappa for patient to staff (n=62-78) ranged from 0.12-0.78, total score Spearman rho 0.66; kappa for family to staff (n=58-67) ranged from -0.06-0.51, total score Spearman rho 0.44. Validity by comparison to patient rating - overall r=-0.09 palliative care and r=0.28 oncology (p>0.05); to family rating overall r=0.38 palliative care and r=0.37 oncology (p>0.05); item kappa 0.00 - 0.61.<br><br>Interobserver reliability mostly r=0.4-0.6 (range 0.27-1.0) ; intraobserver reliability (r=-0.33-0.88) for overall score and range 0.1-1.0 for items; test-retest 0.50 for palliative care team and 0.71 for oncology team |
| Symptom Distress Scale (SDS) <sup>62</sup><br><br>Domain(s): Physical symptoms                                              | Mixed diseases – applied to symptoms in females with lung cancer<br><br>10 items, self-report; modified to 13 items for lung cancer in 1980s                                                                                                                               | Factor analysis with principal components and varimax rotation - 5 factor 65% variance; also correlation of certain items to parts of Karnofsky Performance Status (r= -0.27 to -0.48) overall r=-0.58<br><br>NR                                                                                                                                                                                                                                                                                                                                                                                                                                                                |

| <b>Measure name</b>                                                                                                               | <b>Population Setting</b>                                                                              | <b>Validity Testing</b>                                                                                                                 |
|-----------------------------------------------------------------------------------------------------------------------------------|--------------------------------------------------------------------------------------------------------|-----------------------------------------------------------------------------------------------------------------------------------------|
| <b>Domain(s)</b>                                                                                                                  | <b>Brief description</b>                                                                               | <b>Reliability Data</b>                                                                                                                 |
| Symptom Management at the End of Life in Dementia (SM-EOLD) <sup>11</sup><br><br>Domain(s): Physical symptoms, Emotional symptoms | Single disease - dementia<br><br>9 items; frequency ratings of multiple symptoms                       | Item-total correlations range 0.18 to 0.66; correlations for symptom items on CAD-EOLD r = 0.475 to 0.559<br><br>Cronbach's alpha 0.78  |
| Symptom Monitor <sup>63</sup><br><br>Domain(s): Physical symptoms                                                                 | Mixed diseases<br><br>10-item diary for physical symptoms                                              | NR<br><br>Inter-rater ICCs > 0.75                                                                                                       |
| Willingness to Accept Life-sustaining Treatment instrument (WALT) <sup>64</sup><br><br>Domain(s): Advance care planning           | Mixed diseases; associated with age, ethnicity, & functional impairment<br><br>No description provided | face: reviewed by patients & experts; correlated with simpler measure of preference<br><br>inter-rater 0.73-0.95; test-retest 0.49-0.93 |

\* Recommended Measure

### References for appendix:

1. Morita, T., J. Tsunoda, S. Inoue, et al. 2001. "Communication Capacity Scale and Agitation Distress Scale to measure the severity of delirium in terminally ill cancer patients: a validation study." *Palliative Medicine* 15 (3): 197-206.
2. Chochinov, H. M., K. G. Wilson, M. Enns, et al. 1997. "Are you depressed?" Screening for depression in the terminally ill." *American Journal of Psychiatry* 154 (5): 674-676.
3. Lloyd-Williams, M., M. Dennis, F. Taylor. 2004. "A prospective study to compare three depression screening tools in patients who are terminally ill." *General Hospital Psychiatry* 26: 384-389.
4. Kissane, D. W., S. Bloch, D. P. McKenzie. 1997. "The bereavement phenomenology questionnaire: a single factor only." *Australian & New Zealand Journal of Psychiatry* 31 (3): 370-374.
5. Robinson, L. A., Nuamah, I. F., Lev, E., et al. 1995. "A prospective longitudinal investigation of spousal bereavement examining Parkes and Weiss' Bereavement Risk Index." *Journal of Palliative Care* 11 (4): 5-13.
6. Guo, H., P. G. Fine, T. R. Mendoza, et al. 2001. "A preliminary study of the utility of the brief hospice inventory." *Journal of Pain Symptom Management* 22 (2): 637-648.
7. Abratt, R., G. Viljoen. 1995. "Assessment of quality of life by clinicians--experience of a practical method in lung cancer patients." *South Africa Medical Journal* 85 (9): 896-898.
8. Ewing, G., C. Todd, M. Rogers, et al. 2004. "Validation of a symptom measure suitable for use among palliative care patients in the community: CAMPAS-R." *Journal of Pain Symptom Management* 27 (4): 287-299.
9. Gates, M. F., N. R. Lackey, M. R. White. 1995. "Needs of hospice and clinic patients with cancer." *Cancer Practice* 3 (4): 226-232. Comment in: *Cancer Practice*. 1995 Jul-Aug; 3 (4): 201.
10. Salmon, J. R., J. Kwak, K. D. Acquaviva, et al. 2005. "Validation of the caregiving at life's end questionnaire." *Death Studies* 29 (4): 301-332.
11. Volicer, L., A. C. Hurley, Z. V. Blasi. 2001. "Scales for evaluation of end-of-life care in dementia." *Alzheimer Disease and Associated Disorders* 15 (4): 194-200.
12. Schwartz, C. E., K. Mazor, J. Rogers, et al. 2003. "Validation of a new measure of concept of a good death." *Journal of Palliative Medicine* 6 (4): 575-584.
13. Burnett, P., W. Middleton, B. Raphael, et al. 1997. "Measuring core bereavement phenomena." *Psychological Medicine* 27 (1): 49-57.
14. Kurlowicz, L. H., L. K. Evans, N. E. Strumpf, et al. 2002. "A psychometric

evaluation of the cornell scale for depression in dementia in a frail, nursing home population.” *American Journal of the Geriatric Psychiatry* 10 (5): 600-608.

15. Kirschling, J. M., V. P. Tilden, P. G. Butterfield. 1990. “Social support: the experience of hospice family caregivers.” *Hospice Journal* 6 (2): 75-93.

16. Koedoot, N., S. Molenaar, P. Oosterveld, et al. 2001. “The decisional conflict scale: further validation in two samples of Dutch oncology patients.” *Patient Education Counseling* 45 (3): 187-193.

17. Kassane, D. W., A. Wein, A. Love, et al. 2004. “The demoralization scale: a report of its development and preliminary validation.” *Journal of Palliative Care* 20 (4): 269-276.

18. Herndon, J. E. 2nd, S. Fleishman, M. P. Kosty, et al. 1997. “A longitudinal study of quality of life in advanced non-small cell lung cancer: Cancer and Leukemia Group B (CALGB) 8931.” *Control Clinical Trials* 18 (4): 286-300.

19. Parshall, M. B., J. D. Welsh, D. Y. Brockopp, et al. 2001. “Reliability and validity of dyspnea sensory quality descriptors in heart failure patients treated in an emergency department.” *Heart Lung* 30 (1): 57-65.

20. Kaasa, T., Wessel, J. 2001. “The Edmonton Functional Assessment Tool: further development and validation for use in palliative care.” *Journal of Palliative Care* 17 (1): 5-11.

21. Kaasa, T., J. Wessel, J. Darrah, et al. 2000. “Inter-rater reliability of formally trained and self-trained raters using the Edmonton Functional Assessment Tool.” *Palliative Medicine* 14 (6): 509-517.

22. Salmon, P., F. Manzi, R. M. Valori. 1996. “Measuring the meaning of life for patients with incurable cancer: the life evaluation questionnaire (LEQ).” *European Journal of Cancer* 32A (5): 755-760.

23. Fainsinger, R. L., C. L. Nekolaichuk, P. G. Lawlor, et al. 2005. “A multicenter study of the revised Edmonton staging system for classifying cancer pain in advanced cancer patients.” *Journal of Pain Symptom Management* 29 (3): 224-237.

24. Schwartz, C. E., M. P. Merriman, G. W. Reed, et al. 2004. “Measuring patient treatment preferences in end-of-life care research: applications for advance care planning interventions and response shift research.” *Journal of Palliative Medicine* 7 (2): 233-245.

25. Kristjanson, L. J., A. Leis, P. M. Koop, et al. 1997. “Family members' care expectations, care perceptions, and satisfaction with advanced cancer care: results of a multi-site pilot study.” *Journal of Palliative Care* 13 (4): 5-13.

26. Travis, S. S., M. A. Bernard, W. J. McAuley, et al. 2003. “Development of the family caregiver medication administration hassles scale.” *Gerontologist* 43 (3): 360-368.

27. Vohra, J. U., K. Brazil, S. Hanna, et al. 2004. "Family perceptions of end-of-life care in long term facilities." *Journal of Palliative Care* 20 (4): 297-302.
28. Gloth, F. M. 3rd, J. Walston, J. Meyer, et al. 1995. "Reliability and validity of the Frail Elderly Functional Assessment questionnaire." *American Journal of Physical Medicine Rehabilitation* 74 (1): 45-53.
29. Jordan, J. R., J. Baker, M. Matteis, et al. 2004. "The grief evaluation measure (GEM): an initial validation study." *Journal of Palliative Care* 20 (4): 297-302.
30. Llobera, J., M. Esteva, E. Benito, et al. 2003. "Quality of life for oncology patients during the terminal period: Validation of the HRCA-QL index." *Support Care Cancer* 11 (5): 294-303.
31. Hogan, N. S., D. B. Greenfield, L. A. Schmidt. 2001. "Development and validation of the Hogan Grief Reaction Checklist." *Death Studies* 25 (1): 1-32.
32. Henoch, I., M. Gustafsson. 2003. "Pressure ulcers in palliative care: development of a hospice pressure ulcer risk assessment scale." *International Journal of Palliative Nursing* 9 (11): 474-484.
33. Hopwood, P., Howell, A., Maguire, P. 1991. "Screening for psychiatric morbidity in patients with advanced breast cancer: validation of two self-report questionnaires." *British Journal of Cancer* 64 (2): 353-356.
34. Kristjansson, B., K. Breithaupt, I. McDowell. 2001. "Development and validation of an indicator of support for community-residing older Canadians." *International Psychogeriatrics* 13 Supp 1: 125-135.
35. Green, C.P., C. B. Porter, D. R. Bresnahan, et al. 2000. "Development and evaluation of the Kansas City Cardiomyopathy Questionnaire: a new health status measure for heart failure." *Journal of the American College of Cardiology* 35 (5): 1245-1255.
36. Dobratz, M. C. 1990. "The Life Closure Scale: a measure of psychological adaptation in death and dying." *Hospice Journal* 6 (3): 1-15.
37. Giorgi, F., R. Cellerino, A. Gramazio, et al. 1996. "Assessing quality of life in patients with cancer: a comparison of a visual-analogue and a categorical model." *American Journal of Clinical Oncology* 19 (4): 394-399.
38. Hollen, P. J., R. J. Gralla, M. G. Kris, et al. 1994. "Measurement of quality of life in patients with lung cancer in multicenter trials of new therapies: Psychometric assessment of the Lung Cancer Symptom Scale." *Cancer* 73 (8): 2087-98.
39. Hollen, P. J., R. J. Gralla, M. G. Kris, et al. 1993. "Quality of life assessment in individuals with lung cancer: testing the Lung Cancer Symptom Scale (LCSS)." *European Journal of Cancer* 29 A Suppl 1: S51-58.

40. Hollen, P. J., R. J. Gralla, M. G. Kris, et al. 1999. "Normative data and trends in quality of life from the Lung Cancer Symptom Scale (LCSS)." *Support Care Cancer* 7 (3): 140-148.
41. Hollen, P. J., R. J. Gralla, A. M. Liepa, et al. 2004. "Adapting the Lung Cancer Symptom Scale (LCSS) to mesothelioma: using the LSCC-Meso conceptual model for validation." *Cancer* 101: 587-595.
42. Sterkenburg, C.A., B. King, C. A. Woodward.. 1996. "A reliability and validity study of the McMaster Quality of Life Scale (MQLS) for a palliative population." *Journal of Palliative Care* 12 (1): 18-25.
43. Curtis, J. R., D. L. Patrick, E. Caldwell, et al. 1999. "The quality of patient-doctor communication about end-of-life care: a study of patients with advanced AIDS and their primary care clinicians." *AIDS* 13 (9): 1123-1131.
44. Mystakidou, K., M. Watson, E. Tsilika, et al. 2005. "Psychometric analyses of the Mental Adjustment to Cancer (MAC) scale in a Greek palliative care unit." *Psycho-Oncology* 14: 16-24.
45. Rainbird, K. J., J. J. Perkins, R. W. Sanson-Fisher. 2005. "The Needs Assessment for Advanced Cancer Patients (NA-ACP): a measure of the perceived needs of patients with advanced, incurable cancer. A study of validity, reliability and acceptability." *Psychooncology* 14: 297-306.
46. Warden, V., A. C. Hurley, L. Volicer. 2003. "Development and psychometric evaluation of the Pain Assessment in Advanced Dementia (PAINAD) scale." *Journal of the American Medical Directors Association* 4 (1): 9-15.
47. Hearn, J., I. J. Higginson. 1998. "Development and validation of a core outcome measure for palliative care: the palliative care outcome scale. Palliative Care Core Audit Project Advisory Group." *Quality Health Care* 8 (4): 219-227.
48. Bausewein, C., M. Fegg, L. Radbruch, et al. 2005. "Validation and clinical application of the German version of the palliative care outcome scale." *Journal of Pain Symptom Management* 30 (1): 51-62.
49. Mystakidou, K., E. Tsilika, V. Kouloulis, et al. 2004. "The "Palliative Care Quality of Life Instrument (PQLI)" in terminal cancer patients." *Health Quality Life Outcomes* 2 (1): 8.
50. Gerety, M. B., C. D. Mulrow, M. R. Tuley, et al. 1993. "Development and validation of a physical performance instrument for the functionally impaired elderly: the Physical Disability Index (PDI)." *Journal of Gerontology* 48 (2): M33-38.
51. Jacoby, A., J. Lecouturier, C. Bradshaw, et al. 1999. "Feasibility of using postal



questionnaires to examine carer satisfaction with palliative care: a methodological assessment.” South Tyneside MAAG Palliative Care Study Group. *Palliative Medicine* 13 (4): 285-298.

52. Osse, B. H., M. J. Vernooij, E. Schadé, et al. 2005. “Towards a new clinical tool for needs assessment in the palliative care of cancer patients: the PNPC instrument.” *Journal of Pain Symptom Management* 28 (4): 329-341.

53. Kristjanson, L. J., A. Leis, P. M. Koop, et al. 1997. “Family members' care expectations, care perceptions, and satisfaction with advanced cancer care: results of a multi-site pilot study.” *Journal of Palliative Care* 13 (4): 5-13.

54. Curtis, J. R., D. L. Patrick, R. A. Engelberg, et al. 2002. “A measure of the quality of dying and death. Initial validation using after-death interviews with family members.” *Journal of Pain Symptom Management* 24 (1): 17-31.

55. Mularski, R. A., J. R. Curtis, M. L. Osborne, R. A. Engelberg, L. Ganzini. 2004. “Agreement among family members in their assessment of the quality of dying and death.” *Journal of Pain Symptom Management* 28 (4): 306-315.

56. Hodde, N. M., R. A. Engelberg, P. D. Treece, et al. 2004. “Factors associated with nurse assessment of the quality of dying and death in the intensive care unit.” *Crit Care Med* 32 (8): 1648-1653.

57. Sulmasy, D. P., J. M. McIlvane, P.M. Pasley, et al. 2002. “A scale for measuring patient perceptions of the quality of end-of-life care and satisfaction with treatment: the reliability and validity of QUEST.” *Journal of Pain Symptom Management* 23 (6): 458-470.

58. Steinhauser, K.E., H. B. Bosworth, E. C. Clipp, et al. 2002. “Initial assessment of a new instrument to measure quality of life at the end of life.” *Journal of Palliative Medicine* 5 (6): 829-841.

59. Mystakidou, K., E. Parpa, E. Tsilika, et al. 2002. “The families evaluation on management, care and disclosure for terminal stage cancer patients.” *BMC Palliative Care* 1 (1): 3.

60. Sherman, A. C., S. Simonton, D. C. Adams, et al. 2001. “Measuring religious faith in cancer patients: reliability and construct validity of the Santa Clara Strength of Religious Faith questionnaire.” *Psychooncology* 10 (5): 436-443.

61. Wilson, K. G., I. D. Graham, R. A. Viola, et al. 2004. “Structured interview assessment of symptoms and concerns in palliative care.” *Canadian Journal of Psychiatry* 49: 350-358.

62. Sarna, L., M. L. Brecht. 1997. “Dimensions of symptom distress in women with advanced lung cancer: a factor analysis.” *Heart Lung* 26 (1): 23-30.

63. Hoekstra, J., P. J. Bindels, N. P. van Duijn, et al. 2004. "The symptom monitor. A diary for monitoring physical symptoms for cancer patients in palliative care: feasibility, reliability and compliance." *Journal of Pain Symptom Management* 27 (1): 24-35.
64. Fried, T. R., E. H. Bradley, V. R. Towle. 2002. "Assessment of patient preferences: integrating treatments and outcomes." *The Journals of Gerontology Series B, Psychological Sciences and Social Sciences* 57 (6): S348-S354.
